# Supplementary material
Source: PubMed Central journal article supplement (PMC5172420)
Supplement: NIHMS70607-supplement-Supplementary_Information.pdf [file NIHMS70607-supplement-Supplementary_Information.pdf]

## Supplementary Information

### Initial seeding of embryonic thymus by immune-restricted lymphomyeloid progenitors

Tiago C. Luis<sup>1,11</sup>, Sidinh Luc<sup>1-3,11,12</sup>, Takuo Mizukami<sup>1</sup>, Hanane Boukarabila<sup>1</sup>, Supat Thongjuea<sup>1,3</sup>, Petter S. Woll<sup>1</sup>, Emanuele Azzoni<sup>3</sup>, Alice Giustacchini<sup>1</sup>, Michael Lutteropp<sup>1,3</sup>, Tiphaine Bouriez-Jones<sup>1</sup>, Harsh Vaidya<sup>4</sup>, Adam J. Mead<sup>1</sup>, Deborah Atkinson<sup>1</sup>, Charlotta Böiers<sup>5</sup>, Joana Carrelha<sup>1</sup>, Iain C. Macaulay<sup>1</sup>, Roger Patient<sup>3</sup>, Frederic Geissmann<sup>6,7</sup>, Claus Nerlov<sup>3</sup>, Rickard Sandberg<sup>8</sup>, Marella F.T.R. de Bruijn<sup>3</sup>, C. Clare Blackburn<sup>4</sup>, Isabelle Godin<sup>9</sup>, Sten Eirik W. Jacobsen<sup>1,3,10</sup>

<sup>1</sup>Haematopoietic Stem Cell Laboratory, Weatherall Institute of Molecular Medicine, John Radcliffe Hospital, University of Oxford, Headington, Oxford OX3 9DS, United Kingdom

<sup>2</sup>Hematopoietic Stem Cell Laboratory, Lund Stem Cell Center, Lund University, Klinikgatan 26, 221 84, Lund, Sweden

<sup>3</sup>MRC Molecular Haematology Unit, Weatherall Institute of Molecular Medicine, University of Oxford, Oxford OX3 9DS, United Kingdom.

<sup>4</sup>Institute for Stem Cell Research, MRC Centre for Regenerative Medicine, University of Edinburgh, EH16 4UU Edinburgh, UK

<sup>5</sup>Division of Molecular Medicine and Gene Therapy, Lund Stem Cell Center, Lund University, 22184 Lund, Sweden

<sup>6</sup>King's College London, Great Maze Pond, SE1 1UL London, UK;

<sup>7</sup>Memorial Sloan Kettering Cancer Center, 417 East 68(th) Street, New York, NY 10065, USA

<sup>8</sup>Department of Cell and Molecular Biology, Karolinska Institutet and Ludwig Institute for Cancer Research, 171 77 Stockholm, Sweden <sup>7</sup>Institut National de la Santé et de la Recherche Médicale U1170; Univ Paris-Sud, Université Paris-Saclay; Gustave Roussy, 114, rue Edouard Vaillant; Villejuif, F-94805, France.

<sup>9</sup>Institut National de la Santé et de la Recherche Médicale U1170; Univ Paris-Sud, Université Paris-Saclay; Gustave Roussy, 114, rue Edouard Vaillant; Villejuif, F-94805, France.

<sup>10</sup>Department of Cell and Molecular Biology, Wallenberg Institute for Regenerative Medicine and Department of Medicine Huddinge, Center for Hematology and Regenerative Medicine, Karolinska Institutet and Karolinska University Hospital, 171 77 Stockholm, Sweden

<sup>11</sup>These authors contributed equally to this work

<sup>12</sup>Present address: Division of Hematology/Oncology, Boston Children's Hospital and Department of Pediatric Oncology, Dana-Farber Cancer Institute, Harvard Medical School, Boston, MA 02115, USA

Correspondence should be addressed to S.E.W.J. (sten.eirik.jacobsen@ki.se or sten.jacobsen@imm.ox.ac.uk).

**Supplementary Figure 1 Staging of embryonic day 11 fetal thymus** (Related to main Figure 1)

(a) Staging criteria for E11.0, 11.25, 11.5 and 11.75 embryos with the corresponding somite (S) pairs indicated. Stage criteria (in red) include morphological assessment of branchial arches (1st and 3rd row), nasal processes (2nd and 3rd row) and limb bud (4th row) development. Abbreviations: BA: branchial arches, numbered; M: Maxillary; m: mandibulatory.

(b) Tail somite (TS) counting to stage thymus development. Somite development exhibits a faithful correlation with organ development in the embryo, however some somites especially trunk somites have already initiated their differentiation at E11, resulting in ambiguous and inconsistent somite counts. By correlating somites in the tail, which are still visible at E11, with morphology assessment of branchial arches, nasal processes and limb bud development, TS counts representing the corresponding E11 developmental stages were documented (see **Fig. 1a**). TS counting should only be undertaken in embryos after E11, when the cloaca (\*) is protruding, as similar TS number may be obtained from the base of the limb bud at E10.25-10.75 when the cloaca is not yet protruding.

(c) At E11.5 the 3<sup>rd</sup> pouch derived primordia constituted by the thymus (light red) and parathyroid (dark red) rudiments are attached to the pharyngeal endoderm and surface ectoderm. Separation between the thymus and parathyroid primordia starts around E12.0-E12.5. Scheme adapted from<sup>27</sup>.

(d) Sagittal sections were performed to reveal the fetal thymic lobes which are located in the third branchial arches (arrows) and can be visualized by cytokeratin staining (CK, green; DAPI, blue). I, II and III indicate the 1<sup>st</sup>, 2<sup>nd</sup> and 3<sup>rd</sup> branchial arches, respectively.

(e) At E11.5 the cytokeratin (CK, red left panel, green right panel) positive fetal thymus is not vascularized but surrounded by blood vessels as confirmed by *Vwf* eGFP (green left panel, blue right panel) and VE-Cadherin (VE-Cad, red; right panel) staining. Arrows indicate the location of the thymus rudiment.

**Supplementary Figure 2 Initial seeding of the early embryonic thymus by *Rag1*-GFP expressing cells but not HSCs** (Related to main Figures 1-3)

(a) Surrounding blood vessels (VE-Cad<sup>+</sup>) are typically completely removed in dissected fetal thymus lobes (at E11.5 and E12.5) (VE-Cad, red; CK, green; DAPI, blue).

(b) Fetal liver cells showing overlap in staining with anti-Vwf antibody (green, left) and *Vwf* eGFP (blue, middle), as shown in the merged image (right).

(c,d) Representative FACS profiles (c) and summary (d) of repopulation activity of total thymocytes (fetal thymus; FT) from 4-5 pooled E11.5 embryos or total fetal liver (FL) cells from 3 pooled E12.5 embryos (CD45.2), transplanted intrafemorally into each irradiated (600Gy) *W<sup>A1/41</sup>* (c-kit deficient; CD45.1) recipient. Analysis was performed 2 weeks post-transplantation, since recipients transplanted with FT (but not FL) cells at this time became severely ill and had to be terminated. Data are means (s.d.) from 5 recipient mice receiving FT and 4 recipient mice receiving FL cells.

(e,f) Bone marrow cells ( $25 \times 10^6$ ) from primary recipients (from c,d) were re-transplanted into lethally irradiated CD45.1 recipients (together with  $2 \times 10^5$  CD45.1 bone marrow support cells) to quantify potential stem cell activity in donor-derived (CD45.2) cells. Representative FACS profiles (e) and summary (f) of long-term FT and FL derived (CD45.2) reconstitution of blood cell lineages, 12 weeks post-transplantation, as percentage of total cells within each lineage. Dotted lines indicate the detection level of reconstitution, based on specificity of the antibodies and the number of events acquired by FACS. Mean (s.d.) data from 4 mice in each group.

(g) *Rag1*-GFP (green) expression in cytokeratin (CK, blue) positive thymus lobes from stained sagittal paraffin sections of TS10-15 *Rag1* GFP<sup>+</sup> embryos. Scale bars represent 10  $\mu$ m.

(h) Whole mount immunofluorescence analysis of a TS14 embryo. Transverse optical sections showing localization of thymic rudiments (arrows) identified by cytokeratin (CK) staining. nt, neural tube; \*, notochord. Scale bars represent 300  $\mu$ m.

(i) Whole mount analysis of thymus colonization by *Rag1*-GFP (green) T-TIPs. Serial transverse optical sections (2.5 $\mu$ m) of a TS14 thymic lobe marked by cytokeratin (CK, red) staining showing GFP<sup>+</sup> cells both lining and inside the thymic rudiment. Scale bars represent 30  $\mu$ m.

(j,k) Gating strategy for FACS purification of (j) CD45<sup>+</sup>Lin<sup>-</sup>B220<sup>-</sup>CD19<sup>-</sup>c-Kit<sup>+</sup>Flt3<sup>+</sup>IL-7R $\alpha$ <sup>+</sup> E11.5 fetal liver LMPPs and (k) E14.5 Lin<sup>-</sup>CD4<sup>-</sup>CD8<sup>-</sup>c-Kit<sup>+</sup>CD25<sup>+</sup> DN2 and E14.5 Lin<sup>-</sup>CD4<sup>-</sup>CD8<sup>-</sup>c-Kit<sup>-</sup>CD25<sup>+</sup> DN3 thymocytes. Numbers represent the mean (from 2 biological replicates) percentage of total cells, for each gated cell population.

**Supplementary Figure 3 Combined T and myeloid lineage potential in E11.5 thymus** (Related to main Figures 4-5)

(a) Mean (s.e.m.) frequencies of FACS purified single CD45<sup>+</sup>Lin<sup>-</sup>c-Kit<sup>+</sup>CD25<sup>-</sup>Flt3<sup>+</sup> E12.5 thymic

progenitors from WT mice, revealing T cell ( $n = 48$  cells) and myeloid/GM ( $n = 360$  cells) lineage potential *in vitro*, from 2 and 3 independent experiments, respectively.

**(b)** Representative FACS profile of  $CD4^+CD8^+$  T cells derived from single cell OP9-DL1 culture of FACS purified  $CD45^+Lin^-c-Kit^+CD25^-Flt3^+$  cells from E12.5 thymus.

**(c)** Characteristic morphology of myeloid cells derived from single cell cultures of  $CD45^+Lin^-c-Kit^+CD25^-Flt3^+$  E12.5 thymic progenitors. Representative cells belonging to the monocytic (top row) and granulocytic (bottom row) lineages. Scale bars: 10  $\mu m$ .

**(d-f)** Three representative clones derived from single  $CD45^+Lin^-c-Kit^+CD25^-Flt3^+$  E11.5 thymic progenitor cells cultured on OP9-DL1 stroma generating  $CD4^+CD8^+$  T cells and myeloid cells confirmed by FACS ( $CD11b^+$ ) and/or morphology. Asterisks indicate OP9-DL1 stromal cells. Scale bars: 20  $\mu m$ .

**(g,h)** Representative clone derived from a single  $CD45^+Lin^-c-Kit^+CD25^-Flt3^+Rag1-GFP^+$  cell from the peripheral blood of E11.5 embryos producing  $CD4^+CD8^+$  and  $Thy1.2^+CD25^+$  T cells **(g)** and myeloid (GM) cells confirmed by FACS ( $CD11b^+NK1.1^-$ ; **g**) and morphology **(h)**. Asterisk in **h**, indicate OP9-DL1 stromal cells. Scale bars: 10  $\mu m$ .

**(i)** Flow cytometry analysis of eYFP expression in  $CD11b^+F4/80^+c-Kit^-CD25^-$  monocytes/macrophages, ETPs, DN2s and DN3s from E14.5  $Rag1-Cre^{tg/+}R26^{eYFP/+}$  thymuses. Data are representative of 2 independent experiments with 6 and 7 pooled embryos in each experiment.

**(j)** Flow cytometry analysis of  $Rag1-GFP$  expression in  $CD11b^+F4/80^+c-Kit^-CD25^-$  macrophages, ETPs, DN2s and DN3s from E14.5  $Rag1-GFP$  thymuses. Data are representative of 2 independent experiments with 6 and 8 pooled embryos in each experiment.

**(k,l)** Single cell immunofluorescence analysis of intracellular eYFP localization in sorted  $eYFP^+$  and  $eYFP^-$   $CD11b^+F4/80^+c-Kit^-CD25^-$  monocytes/macrophages **(k)** and  $eYFP^+$   $CD11b^-F4/80^-c-Kit^+CD25^-$  ETPs **(l)** from E14.5  $Rag1-Cre^{tg/+}R26^{eYFP/+}$  thymuses. Images representative of 80, 17 and 26 single  $eYFP^+$  monocytes/macrophages,  $eYFP^-$  monocytes/macrophages and  $eYFP^+$  ETPs analyzed, respectively. DIC, differential interference contrast.

**(m,n)** Representative FACS profiles and mean (s.d.) frequency **(m)** of CD45.2 reconstitution of thymocytes in CD45.1 lethally irradiated recipient mice, 3 weeks post-transplantation with a mixture of  $Rag1-Cre^{Tg/+}$  and  $R26-stop-eYFP^{FL/FL}$  (1:1) CD45.2 bone marrow cells. **(n)** Frequency of  $eYFP^+$  cells within  $CD11b^+F4/80^+CD4^-CD8^-c-Kit^-CD25^-$  macrophages. Data are means (s.d.) of 4 recipient mice. Values in **(m)** are mean frequencies of total thymocytes (left plot) and of total CD45.2 thymocytes

(right plot). Values in (n) are mean frequencies of total CD45.2 thymus cells (left plot) and of total CD45.2 macrophages (right plot).

**Supplementary Figure 4 Lineage potentials in E11.5 thymus** (Related to main Figures 4 and 5)

(a) Morphology of representative myeloid cells from cultures of E11.5 embryonic thymus. White arrows indicate monocytic cells, and black arrows granulocytic cells. Asterisk indicates OP9/OP9-DL1 stromal cells. Scale bars: 10  $\mu$ m.

(b) Representative acetylcholinesterase stained CFU-Mk colonies from E11.5 fetal liver. Scale bars represent 100  $\mu$ m.

(c) Mean (s.d.) number of DAF<sup>+</sup> erythroid colonies generated from E11.5 unfractionated fetal liver cells cultured in semi-solid methylcellulose ( $n = 4$ ; 50,000 cells/biological replicate).

(d,e) Representative flow cytometry analyses of T cell (d) and B cell (e) producing cultures of individual thymic lobes from *Rag1*-GFP E11.5 embryos.

(f) Gating strategy for FACS sorting of Lin<sup>-</sup>CD45<sup>lo</sup>VE-Cad<sup>+</sup>c-Kit<sup>+</sup> AGM stem/progenitor cells (HSPC). Numbers represent mean frequencies of total cells, from 3 litters analysed in 2 independent experiments.

(g) Representative FACS profiles of pooled E12.5 thymuses. Virtually all *Rag1*-GFP<sup>+</sup> cells express CD45 and progenitor markers c-Kit and Flt3 but are negative for lineage markers and CD25. The number in the first plot reflects the percentage of total cells, whereas subsequent plots show frequencies relative to total GFP<sup>+</sup> cells. All frequencies are means of 3 litters (6-7 embryos pooled in each litter) from 2 independent experiments.

**Supplementary Figure 5 Global gene expression analysis of T-IPs/ETPs, LMPPs and HSCs at different stages of development** (Related to main Figure 7)

Hierarchical clustering by genes (a) or by cell populations (b) indicating the relationship between the different cell populations analyzed, according to their global gene expression profile. In b, hierarchical clustering was performed using the multi-scale bootstrap resampling method. Red values denote Approximately Unbiased (AU)  $p$ -values (%), and green values denote Bootstrap Probability (BP)  $p$ -values (%).

**Supplementary Figure 6 Embryonic *Ccr*, *Pir* and Notch related gene expression in T-IPs, ETPs and candidate thymus seeding progenitors** (Related to main Figure 7 and 8)

(a) Representative flow cytometry analysis of the expression of CCR6, 7 and 9 in E11.5 T-IPs. Numbers represent mean percentages of data from 3 experiments, with 7-9 pooled embryos per experiment. Grey, isotype control; Red, specific anti-CCR antibody.

(b) Heatmap for co-expression ( $\Delta$ Ct values, relative to *Hprt*) of the highest expressed chemokine receptor genes in single E11.5 CD45<sup>+</sup>Lin<sup>-</sup>c-Kit<sup>+</sup>CD25<sup>-</sup>Flt3<sup>+</sup> T-IPs ( $n = 85$  cells, from 2 biological replicates (each a pool of 5 and 9 embryos). Red indicates high, white intermediate and blue low expression levels. Grey indicates below detection level. Three cells were excluded due to absence of *Flt3* amplification.

(c) Expression of *Pir* genes in E11.5 T-IPs ( $n = 6$ ), as compared to E11.5 AGM HSPCs ( $n = 3$ ) and E11.5 FL LMPPs ( $n = 3$ ), as well as intra-thymic E12.5 ( $n = 3$ ), neonatal (NN; 1 week;  $n = 3$ ) and Adult (8 weeks;  $n = 3$ ) ETPs. Expression is presented as mean (s.d.) RPKM. Significant differences between different populations are marked with asterisks (\* $p < 0.05$ , \*\* $p < 0.01$ , \*\*\* $p < 0.001$ ); 0, below detection level.  $n$  represents biological replicates.

(d) Mean (s.d.) percentage of single E11.5 CD45<sup>+</sup>Lin<sup>-</sup>c-Kit<sup>+</sup>CD25<sup>-</sup>Flt3<sup>+</sup> T-IPs co-expressing *Pir*, GM and lymphoid affiliated genes while not expressing Mk or E genes. Only cells that amplified *Flt3*, *c-Kit* and *Hprt* (corresponding to 97% of total cells analyzed) were included. ( $n=85$  cells, from 2 biological replicates, each using a pool of 5-9 embryos).

(e) Representative flow cytometry analysis PIRA/B expression in E11.5 fetal liver CD45<sup>+</sup>Lin<sup>-</sup>B220<sup>-</sup>CD19<sup>-</sup>c-Kit<sup>+</sup>Flt3<sup>+</sup>IL-7R $\alpha$ <sup>+</sup> LMPPs ( $n=2$ ), E11.5 CD45<sup>+</sup>Lin<sup>-</sup>c-Kit<sup>+</sup>CD25<sup>-</sup>Flt3<sup>+</sup>*Rag1*-GFP<sup>+</sup> cells in circulation ( $n=3$ ), CD45<sup>+</sup>Lin<sup>-</sup>c-Kit<sup>+</sup>CD25<sup>-</sup>Flt3<sup>+</sup>*Rag1*-GFP<sup>+</sup> T-IPs ( $n=3$ ) and E12.5 CD45<sup>+</sup>Lin<sup>-</sup>c-Kit<sup>+</sup>CD25<sup>-</sup>Flt3<sup>+</sup>*Rag1*-GFP<sup>+</sup> ETPs ( $n=3$ ). Numbers in plots indicate average percentages of all biological replicate ( $n = 2-3$ ), each replicate from a pool of 5-9 embryos.

(f) Myeloid and/or T cell generation from single CD45<sup>+</sup>Lin<sup>-</sup>c-Kit<sup>+</sup>CD25<sup>-</sup>Flt3<sup>+</sup> PIRA/B<sup>+</sup> or PIRA/B<sup>-</sup> cells isolated from circulation of E11.5 embryos and cultured on OP9-DL1 ( $n=254$  cells). Mean (s.d.) frequencies from 3 independent experiments are shown.

**Supplementary Figure 7 Thymus rudiment colonization by T-IPs in E11.5 *Rbpj* deficient embryos** (Related to main Figure 8)

(a,b) Whole mount imaging of a *Rbpj*<sup>Fl/Fl</sup> *Vav*-Cre<sup>+/+</sup> *Rag1*-GFP<sup>Tg/+</sup> TS11 embryo. (a) Transverse

optical section showing localization of thymic rudiments (arrows) identified by cytokeratin (CK, red). nt, neural tube; \*, notochord. Scale bars represent 300  $\mu\text{m}$ . (b) Three-dimensional image of the left and right thymic lobes showing the thymus rudiment surrounded by *Rag1*-GFP<sup>+</sup> (green) T-IPs. Note that the thymus rudiment is connected to the third pharyngeal pouch on one side and to the external ectoderm on the other side. Scale bars represent 50  $\mu\text{m}$ .

(c-e) Using the “surfaces” function of Imaris software the thymus rudiment was 3D-reconstructed to allow the quantification of the distances to *Rag1*-GFP<sup>+</sup> cells. Image segmentation (d, e) was made based on cytokeratin fluorescence intensity (c) and morphology (see also Supplementary Fig. 1). Scale bars represent 50  $\mu\text{m}$ .

(f,g) Serial transverse optical sections (2.5  $\mu\text{m}$ ) of the thymic rudiment region from a *Rbpj*<sup>F/FI</sup> *Vav*-Cre<sup>+/+</sup> *Rag1*-GFP<sup>Tg/+</sup> (c, *Vav*-Cre<sup>+/+</sup>) and a *Rbpj*<sup>F/FI</sup> *Vav*-Cre<sup>Tg/+</sup> *Rag1*-GFP<sup>Tg/+</sup> (d, *Vav*-Cre<sup>Tg/+</sup>) embryo. Images are representative of 8 and 6 thymic lobes from 4 *Vav*-Cre<sup>+/+</sup> and 3 *Vav*-Cre<sup>Tg/+</sup> embryos, respectively. Scale bars represent 50  $\mu\text{m}$ . (c-g) TPP, thymus-parathyroid primordium; PE, pharyngeal endoderm; SE, surface ectoderm

### **Supplementary Figure 8 E11.5 *Rbpj*-deficient T-IPs show unaffected expression of Notch related and lineage affiliated genes** (Related to main Figure 8)

(a-d) Single cell gene expression analysis of E11.5 CD45<sup>+</sup>Lin<sup>-</sup>c-Kit<sup>+</sup>CD25<sup>-</sup>Flt3<sup>+</sup> T-IPs from *Rbpj*<sup>F/FI</sup> *Vav*-Cre<sup>Tg/+</sup> *Rag1*-GFP<sup>Tg/+</sup> ( $n=46$  cells from 6 embryos) and *Rbpj*<sup>F/FI</sup> *Vav*-Cre<sup>+/+</sup> *Rag1*-GFP<sup>Tg/+</sup> ( $n=36$  cells from 8 embryos) littermate controls from 2 different litters. Only cells that amplified *Flt3*, *c-Kit* and *Hprt* (corresponding to 98% of total cells analyzed) were included. (a) *Rbpj* (b) Notch receptors and Notch target genes (c) frequency of single cells co-expressing GM and early lymphoid affiliated genes. (d) T cell related genes. (b-d) For additional gene expression analysis of *Vav*-Cre<sup>+</sup> cells only cells in which *Rbpj* had been deleted were included. For panels (a-d) numbers indicate the frequencies of positive cells. For panels b-d no differences between Cre<sup>-</sup> and Cre<sup>+</sup> cells were statistically significant ( $p<0.05$ ).

(e,f) Impact of *Rbpj*-deficiency on thymocyte progenitor development during early stages of embryonic development. Representative flow cytometry analysis of thymus rudiments from E13.5 (e) and E14.5 (f) *Rbpj*<sup>F/FI</sup> *Vav*-Cre<sup>Tg/+</sup> *Rag1*-GFP<sup>Tg/+</sup> (*Vav*-Cre<sup>Tg/+</sup>;  $n=3$  and  $n=4$ , respectively) and *Rbpj*<sup>F/FI</sup> *Vav*-Cre<sup>+/+</sup> *Rag1*-GFP<sup>Tg/+</sup> (*Vav*-Cre<sup>+/+</sup>;  $n=7$  and  $n=11$ , respectively) littermate control embryos. Numbers represent frequencies of total CD45<sup>+</sup> cells.

(g) *In vitro* T cell differentiation of E11.5  $Rbpj^{F/F1}Vav-Cre^{Tg/+}$  ( $Vav-Cre^{Tg/+}$ ) and  $Rbpj^{F/F1}Vav-Cre^{+/+}Rag1-GFP^{Tg/+}$  ( $Vav-Cre^{+/+}$ ) T-IPs on OP9-DL1 stroma. Data are representative of 4  $Vav-Cre^{+/+}$  and 6  $Vav-Cre^{Tg/+}$  embryos analysed following 14 days of culture. Numbers represent frequencies of total  $CD45^+$  cells.



## SUPPLEMENTARY TABLES

**Supplementary Table 7** Antibodies used for immunofluorescence staining

| Antigen                     | Clone      | Host    | Species reactivity | Supplier                   | Application                             |
|-----------------------------|------------|---------|--------------------|----------------------------|-----------------------------------------|
| <b>Primary Antibodies</b>   |            |         |                    |                            |                                         |
| Cytokeratin                 | Polyclonal | Rabbit  | Mouse              | Dako                       | <i>Paraffin section<br/>Whole mount</i> |
| GFP                         | Polyclonal | Chicken | Jelly fish         | Abcam                      | Paraffin sections                       |
| GFP                         | Polyclonal | Rabbit  | Jelly fish         | Life technologies          | Whole mount                             |
| Vwf                         | Polyclonal | Rabbit  | Mouse              | Millipore                  | Paraffin sections                       |
| VE-Cadherin                 | Polyclonal | Goat    | Mouse              | R&D                        | Paraffin sections                       |
| F4/80                       | Cl:A3-1    | Rat     | Mouse              | Abcam                      | Paraffin sections                       |
| <b>Secondary Antibodies</b> |            |         |                    |                            |                                         |
| IgG Cy3                     | -          | Donkey  | Goat               | Jackson Immu. Laboratories | Paraffin sections                       |
| IgG DyLight 488             | -          | Donkey  | Chicken            | Jackson Immu. Laboratories | Paraffin sections                       |
| IgG DyLight 549             | -          | Donkey  | Rat                | Jackson Immu. Laboratories | Paraffin sections                       |
| IgG DyLight 649             | -          | Donkey  | Chicken            | Jackson Immu. Laboratories | Paraffin sections                       |
| IgG AlexaFluor 488          | -          | Donkey  | Rabbit             | Invitrogen                 | Paraffin sections                       |
| IgG AlexaFluor 633          | -          | Goat    | Rabbit             | Invitrogen                 | Paraffin sections                       |
| IgG AlexaFluor 488          | -          | Goat    | Chicken            | Life technologies          | Whole mount                             |
| IgG AlexaFluor 555          | -          | Goat    | Rabbit             | Life technologies          | Whole mount                             |

**Supplementary Table 8** Antibodies and viability stains used for FACS

| Antibody                     | Clone        | Supplier       | Application                                                                              |
|------------------------------|--------------|----------------|------------------------------------------------------------------------------------------|
| 7-aminoactinomycin D (7-AAD) | -            | Sigma          | Viability dye                                                                            |
| B220 PE-Cy5                  | RA3-6B2      | BioLegend      | Lineage cocktail for BM LSKFLT3 staining and AGM HSPC staining                           |
| B220 APC                     | RA3-6B2      | BD Biosciences | Lineage cocktail for NN and adult ETP staining                                           |
| B220 PE-Cy7                  | RA3-6B2      | BioLegend      | Lineage cocktail for T-IP staining in fetal thymus, LMPP staining in fetal liver         |
| CCR9 APC                     | eBioCW-1.2   | E-bioscience   | T-IP staining in fetal thymus                                                            |
| CCR6 PE                      | 29-2L17      | BioLegend      | T-IP staining in fetal thymus                                                            |
| CCR7 PE                      | RB12         | BD Biosciences | T-IP staining in fetal thymus                                                            |
| CCR9 PECy7                   | CW-1.2       | BioLegend      | T-IP staining in fetal thymus                                                            |
| CD11c APC                    | N418         | E-bioscience   | Lineage cocktail for NN and adult ETP staining                                           |
| CD16/32 purified             | 2.4G2        | Hybridoma      | Fc-block                                                                                 |
| CD150 APC                    | TC15-12F12.2 | BioLegend      | Platelet analysis                                                                        |
| CD19 APC                     | 1D3          | BD Biosciences | Lineage cocktail for NN and adult ETP, and BM LSKFLT3 staining                           |
| CD19 Pacific blue            | 1D3          | E-bioscience   | In vitro B cell readout                                                                  |
| CD19 PE                      | 1D3          | BD Biosciences | In vitro B cell readout                                                                  |
| CD19 PE-Cy5                  | 1D3          | E-bioscience   | Lineage cocktail for BM LSKFLT3 staining and AGM HSPC staining                           |
| CD19 PE-Cy7                  | 1D3          | E-bioscience   | Lineage cocktail for T-IP staining in fetal thymus; LMPP staining in fetal liver         |
| CD25 PE                      | 3C7          | BD Biosciences | In vitro T cell readout                                                                  |
| CD25 PerCP-Cy5.5             | PC61         | BD Biosciences | T-IP/ETP and DN staining                                                                 |
| CD3e APC                     | 145-2C11     | E-bioscience   | Lineage cocktail for NN and adult ETP, BM LSKFLT3 staining and fetal liver LMPP staining |
| CD31 PE-Cy7                  | 390          | E-bioscience   | AGM HSPC staining                                                                        |
| CD4 AlexaFluor700            | RM4-5        | E-bioscience   | NN and adult ETP staining                                                                |
| CD4 APC-eFluor780            | RM4-5        | E-bioscience   | In vitro T cell readout and peripheral blood analysis                                    |
| CD4 PE-Cy7                   | RM4-5        | BD Biosciences | Lineage cocktail for T-IP staining in fetal thymus                                       |
| CD4 PE-Cy5                   | RM4-5        | BD Biosciences | Lineage cocktail for BM LSKFLT3 staining                                                 |
| CD41 PE                      | MWRReg30     | E-bioscience   | Platelet analysis                                                                        |
| CD44 APC                     | IM7          | BioLegend      | In vitro T cell readout                                                                  |
| CD45 AlexaFluor700           | 30-F11       | E-bioscience   | ETP staining in E12.5 thymus, LMPP staining in fetal liver                               |
| CD45 PE                      | 30-F11       | E-bioscience   | AGM HSPC staining                                                                        |
| CD45 Pacific Orange          | 30-F11       | Invitrogen     | In vitro hematopoietic readout                                                           |
| CD45.1 biotin                | A20          | BD Biosciences | Peripheral blood reconstitution analysis                                                 |
| CD45.1 PE                    | A20          | BD Biosciences | Peripheral blood reconstitution analysis                                                 |
| CD45.2 AF700                 | 104          | BioLegend      | Peripheral blood reconstitution analysis                                                 |
| CD45.2 FITC                  | 104          | BD Biosciences | Peripheral blood reconstitution analysis                                                 |
| CD45.2 PerCP-Cy5.5           | 104          | BD Biosciences | Peripheral blood reconstitution analysis                                                 |
| CD5 PE-Cy5                   | 53-7.3       | BioLegend      | Lineage cocktail for BM LSKFLT3 staining and AGM HSPC staining                           |
| CD8 $\alpha$ APC-eFluor780   | 53-6.7       | E-bioscience   | In vitro readout T cell readout and peripheral blood analysis                            |
| CD8 $\alpha$ PE-Cy7          | 53-6.7       | E-bioscience   | NN and adult ETP staining, and lineage cocktail for T-IP staining in fetal thymus        |
| CD8 $\alpha$ PE-Cy5          | 53-6.7       | BD Biosciences | Lineage cocktail for BM LSKFLT3 staining and AGM HSPC staining                           |
| c-kit APC-eFluor780          | 2B8          | E-bioscience   | T-IP/ETP, LSKFLT3, and AGM HSPC stainings, LMPP staining in fetal liver                  |

|                                                       |           |                              |                                                                                                            |
|-------------------------------------------------------|-----------|------------------------------|------------------------------------------------------------------------------------------------------------|
| DAPI (4',6-diamidino-2-phenylindole, dihydrochloride) | -         | Invitrogen                   | Viability dye                                                                                              |
| F4/80 PE-Cy7                                          | BM8       | BioLegend                    | In vitro myeloid readout                                                                                   |
| F4/80 APC                                             | BM8       | Invitrogen<br>BioLegend      | In vitro myeloid readout, Lineage cocktail for fetal liver LMPP staining. Fetal thymus macrophage staining |
| Flt3 biotin                                           | A2F10     | E-Bioscience                 | T-IP/ETP staining, LMPP staining in fetal liver                                                            |
| Flt3 PE                                               | A2F10     | BD Biosciences,<br>BioLegend | T-IP/ETP staining, LSKFLT3 staining in BM                                                                  |
| Gr-1 APC                                              | RB6-8C5   | E-bioscience                 | Lineage cocktail for NN and adult ETP, BM LSKFLT3 staining and fetal liver LMPP                            |
| Gr-1 Pacific Orange                                   | RB6-8C5   | Invitrogen                   | In vitro myeloid readout and peripheral blood analysis                                                     |
| Gr-1 PE                                               | RB6-8C5   | E-bioscience                 | In vitro myeloid readout                                                                                   |
| Gr-1 PE-Cy5                                           | RB6-8C5   | BioLegend                    | Lineage cocktail for BM LSKFLT3 staining and AGM HSPC staining                                             |
| IL-7R biotin                                          | A7R34     | E-bioscience                 | LMPP staining in BM, TI-P staining in fetal thymus rudiment                                                |
| IL-7R PE                                              | A7R34     | E-bioscience                 | LMPP staining in fetal liver                                                                               |
| Mac-1 AlexaFluor700                                   | M1/70     | E-bioscience                 | In vitro myeloid readout                                                                                   |
| Mac-1 APC                                             | M1/70     | BioLegend                    | Peripheral blood reconstitution analysis                                                                   |
| Mac-1 PE-Cy5                                          | M1/70     | BioLegend                    | Lineage cocktail for BM LSKFLT3 staining                                                                   |
| Mac-1 PE                                              | M1/70     | E-bioscience                 | Fetal thymus macrophage staining                                                                           |
| NK1.1 APC                                             | PK136     | E-bioscience                 | Lineage cocktail for NB ETP and LMPP in fetal liver                                                        |
| NK1.1 FITC                                            | PK136     | E-bioscience                 | In vitro NK cell readout                                                                                   |
| NK1.1 Pacific blue                                    | PK136     | BioLegend                    | In vitro NK cell readout and peripheral blood analysis                                                     |
| NK1.1 BV605                                           | PK136     | BioLegend                    | In vitro T cell readout                                                                                    |
| PirA/B APC                                            | 10-1-PIR  | E-bioscience                 | LMPP staining in fetal liver, TI/ETP-P staining in fetal thymus rudiment and fetal blood staining          |
| Sca-1 FITC                                            | E13-161.7 | BD Biosciences               | LSKFLT3 staining in BM, LMPP staining in fetal liver                                                       |
| Sca-1 Pacific Blue                                    | E13-161.7 | BioLegend                    | LSKFLT3 staining in BM                                                                                     |
| Streptavidin PE-TXR                                   | -         | BD Biosciences               | NN and adult ETP staining                                                                                  |
| Streptavidin QD655                                    | -         | Invitrogen                   | LMPP staining in fetal liver                                                                               |
| Sytox Blue                                            | -         | Invitrogen                   | Viability dye                                                                                              |
| Tcr $\beta$ APC                                       | H57-597   | E-bioscience                 | Lineage cocktail for NN and adult ETP staining                                                             |
| Tcr $\gamma\delta$ APC                                | eBioGL3   | E-bioscience                 | Lineage cocktail for NN and adult ETP staining                                                             |
| Ter119 PE-Cy5                                         | TER119    | BioLegend                    | Lineage cocktail for BM LSKFLT3 staining and AGM HSPC staining                                             |
| Ter119 PE-Cy5.5                                       | TER119    | E-bioscience                 | Platelet analysis (negative marker)                                                                        |
| Ter119 APC                                            | TER119    | E-bioscience                 | Lineage cocktail for fetal liver LMPP staining                                                             |
| Thy1.2 APC                                            | 53-2.1    | E-bioscience                 | In vitro T cell readout                                                                                    |
| Thy1.2 PE-Cy5                                         | 30-H12    | BioLegend                    | In vitro T cell readout                                                                                    |
| VE-Cad (CD144) APC                                    | BV13      | E-bioscience                 | AGM HSPC staining                                                                                          |

**Supplementary Table 9** Cytokines used for *in vitro* assays

| <b>Growth factor</b>                                                      | <b>Supplier</b>               | <b>Assay</b>                                                                                                                                                                                                             | <b>Final conc. (ng/ml)</b>                                          |
|---------------------------------------------------------------------------|-------------------------------|--------------------------------------------------------------------------------------------------------------------------------------------------------------------------------------------------------------------------|---------------------------------------------------------------------|
| <b>Murine stem cell factor</b><br>mSCF                                    | <i>R&amp;D Systems</i>        | <i>Mk liquid culture</i><br><i>GM liquid culture</i><br><i>B cell OP9 co-culture</i><br><i>T cell OP9-DL1 co-culture</i><br><i>Myeloid OP9 co-culture</i><br><i>T cell/myeloid combined</i><br><i>OP9-DL1 co-culture</i> | 50 ng/ml<br>25 ng/ml<br>25 ng/ml<br>25 ng/ml<br>10 ng/ml<br>10ng/ml |
| <b>Murine interleukin 3</b><br>mIL-3                                      | <i>R&amp;D Systems</i>        | <i>Mk liquid culture</i><br><i>GM liquid culture</i><br><i>Myeloid OP9 co-culture</i><br><i>Megacult culture</i><br><i>T cell/myeloid combined</i><br><i>OP9-DL1 co-culture</i>                                          | 20 ng/ml<br>10 ng/ml<br>10 ng/ml<br>10 ng/ml<br>10 ng/ml            |
| <b>Murine granulocyte/macrophage colony stimulating factor</b><br>mGM-CSF | <i>Immunex</i>                | <i>GM liquid culture</i><br><i>Myeloid OP9 co-culture</i><br><i>T cell/myeloid combined</i><br><i>OP9-DL1 co-culture</i>                                                                                                 | 25 ng/ml<br>10 ng/ml<br>10 ng/ml                                    |
| <b>Human granulocyte colony stimulating factor</b><br>hG-CSF              | <i>Amgen</i>                  | <i>T cell/myeloid combined</i><br><i>OP9-DL1 co-culture</i><br><i>GM liquid culture</i><br><i>Myeloid OP9 co-culture</i>                                                                                                 | 10 ng/ml<br>25 ng/ml<br>10 ng/ml                                    |
| <b>Human colony stimulating factor 1</b><br>hCSF-1                        | <i>Peprotech</i>              | <i>GM liquid culture</i><br><i>Myeloid OP9 co-culture</i><br><i>T cell/myeloid combined</i><br><i>OP9-DL1 co-culture</i>                                                                                                 | 25 ng/ml<br>10 ng/ml<br>10 ng/ml                                    |
| <b>Human erythropoietin</b><br>hEPO                                       | <i>Janssen-Cilag</i>          | <i>Mk liquid culture</i>                                                                                                                                                                                                 | 5 U/ml                                                              |
| <b>Human FLT3 ligand</b><br>hFLT3L                                        | <i>Immunex</i>                | <i>Mk liquid culture</i><br><i>GM liquid culture</i><br><i>B cell OP9 co-culture</i><br><i>T cell OP9-DL1 co-culture</i><br><i>Myeloid OP9 co-culture</i><br><i>T cell/myeloid combined</i><br><i>OP9-DL1 co-culture</i> | 50 ng/ml<br>25 ng/ml<br>25 ng/ml<br>25 ng/ml<br>5 ng/ml<br>5 ng/ml  |
| <b>Human interleukin 6</b><br>hIL-6                                       | <i>Genetics Institute Inc</i> | <i>Myeloid OP9 co-culture</i><br><i>Megacult culture</i><br><i>T cell/myeloid combined</i><br><i>OP9-DL1 co-culture</i>                                                                                                  | 10 ng/ml<br>20 ng/ml<br>10 ng/ml                                    |
| <b>Human interleukin 7</b><br>hIL-7                                       | <i>R&amp;D Systems</i>        | <i>B cell OP9 co-culture</i><br><i>Myeloid OP9 co-culture</i><br><i>T cell/myeloid combined</i><br><i>OP9-DL1 co-culture</i>                                                                                             | 20 ng/ml<br>1 ng/ml<br>1 ng/ml                                      |
| <b>Human interleukin 11</b><br>hIL-11                                     | <i>Genetics Institute Inc</i> | <i>Megacult culture</i>                                                                                                                                                                                                  | 50 ng/ml                                                            |
| <b>Human thrombopoietin</b><br>hTHPO                                      | <i>Peprotech</i>              | <i>Mk liquid culture</i><br><i>GM liquid culture</i><br><i>Megacult culture</i>                                                                                                                                          | 50 ng/ml<br>25 ng/ml<br>50 ng/ml                                    |

**Supplementary Table 10** Taqman assays used for multiplex quantitative single cell PCR

|                      |                                                            |               |
|----------------------|------------------------------------------------------------|---------------|
| <b><i>Bcl11b</i></b> | B-cell leukemia/lymphoma 11B                               | Mm00480516_m1 |
| <b><i>Ccr2</i></b>   | chemokine (C-C motif) receptor 2                           | Mm04207877_m1 |
| <b><i>Ccr3</i></b>   | chemokine (C-C motif) receptor 3                           | Mm00515543_s1 |
| <b><i>Ccr5</i></b>   | chemokine (C-C motif) receptor 5                           | Mm01963251_s1 |
| <b><i>Ccr7</i></b>   | chemokine (C-C motif) receptor 7                           | Mm01301785_m1 |
| <b><i>Ccr9</i></b>   | chemokine (C-C motif) receptor 9                           | Mm02620030_s1 |
| <b><i>Cd3d</i></b>   | CD3 antigen, delta polypeptide                             | Mm00442746_m1 |
| <b><i>Cd3e</i></b>   | CD3 antigen, epsilon polypeptide                           | Mm00599683_m1 |
| <b><i>Cd3g</i></b>   | CD3 antigen, gamma polypeptide                             | Mm00438095_m1 |
| <b><i>CD79a</i></b>  | CD79A antigen (immunoglobulin-associated alpha)            | Mm00432423_m1 |
| <b><i>Cebpa</i></b>  | CCAAT/enhancer binding protein (C/EBP), alpha              | Mm00514283_s1 |
| <b><i>Csf1r</i></b>  | colony stimulating factor 1 receptor                       | Mm01266652_m1 |
| <b><i>Csf2ra</i></b> | colony stimulating factor 2 receptor, alpha                | Mm00438331_g1 |
| <b><i>Csf3r</i></b>  | colony stimulating factor 3 receptor (granulocyte)         | Mm00432735_m1 |
| <b><i>Cxcr4</i></b>  | chemokine (C-X-C motif) receptor 4                         | Mm01996749_s1 |
| <b><i>Dtx1</i></b>   | deltex 1 homolog (Drosophila)                              | Mm00492297_m1 |
| <b><i>Ebf1</i></b>   | early B cell factor 1                                      | Mm00432948_m1 |
| <b><i>Epor</i></b>   | erythropoietin receptor                                    | Mm00438760_m1 |
| <b><i>Esam</i></b>   | endothelial cell-specific adhesion molecule                | Mm00518378_m1 |
| <b><i>Evi1</i></b>   | MDS1 and EVI1 complex locus                                | Mm00491303_m1 |
| <b><i>Fcgr3</i></b>  | Fc receptor, IgG, low affinity III                         | Mm00438882_m1 |
| <b><i>Flt3</i></b>   | FMS-like tyrosine kinase 3                                 | Mm00439016_m1 |
| <b><i>Gapdh</i></b>  | glyceraldehyde-3-phosphate dehydrogenase                   | Mm99999915_g1 |
| <b><i>Gata1</i></b>  | GATA binding protein 1                                     | Mm01352636_m1 |
| <b><i>Gata2</i></b>  | GATA binding protein 2                                     | Mm00492301_m1 |
| <b><i>Gata3</i></b>  | GATA binding protein 3                                     | Mm00484683_m1 |
| <b><i>Hes1</i></b>   | hairy and enhancer of split 1 (Drosophila)                 | Mm01342805_m1 |
| <b><i>Hes5</i></b>   | hairy and enhancer of split 5 (Drosophila)                 | Mm00439311_g1 |
| <b><i>Hey1</i></b>   | hairy/enhancer-of-split related with YRPW motif 1          | Mm00468865_m1 |
| <b><i>Hey2</i></b>   | hairy/enhancer-of-split related with YRPW motif 2          | Mm00469280_m1 |
| <b><i>Hoxb4</i></b>  | homeobox B4                                                | Mm00657964_m1 |
| <b><i>Hprt1</i></b>  | hypoxanthine guanine phosphoribosyl transferase 1          | Mm01545399_m1 |
| <b><i>Igmh</i></b>   | immunoglobulin heavy constant mu                           | Mm01718955_g1 |
| <b><i>Ikzf1</i></b>  | IKAROS family zinc finger 1                                | Mm00456421_m1 |
| <b><i>Il2ra</i></b>  | interleukin 2 receptor, alpha chain                        | Mm00434261_m1 |
| <b><i>Il7r</i></b>   | interleukin 7 receptor                                     | Mm00434295_m1 |
| <b><i>Kit</i></b>    | kit oncogene                                               | Mm00445212_m1 |
| <b><i>Klf1</i></b>   | Kruppel-like factor 1 (erythroid)                          | Mm04208330_g1 |
| <b><i>Lck</i></b>    | lymphocyte protein tyrosine kinase                         | Mm00802897_m1 |
| <b><i>Lilrb3</i></b> | leukocyte immunoglobulin-like receptor, subfamily B (Pirb) | Mm01700366_m1 |
| <b><i>Mpl</i></b>    | myeloproliferative leukemia virus oncogene                 | Mm00440310_m1 |
| <b><i>Mpo</i></b>    | Myeloperoxidase                                            | Mm01298424_m1 |
| <b><i>Notch1</i></b> | Notch gene homolog 1 (Drosophila)                          | Mm00435249_m1 |
| <b><i>Nrarp</i></b>  | Notch-regulated ankyrin repeat protein                     | Mm00482529_s1 |
| <b><i>Pax5</i></b>   | paired box gene 5                                          | Mm00435501_m1 |
| <b><i>Pf4</i></b>    | platelet factor 4                                          | Mm00451315_g1 |
| <b><i>Pira2</i></b>  | paired-Ig-like receptor A2                                 | Mm02768273_g1 |
| <b><i>Pira6</i></b>  | paired-Ig-like receptor A2                                 | Mm01705006_sH |
| <b><i>Procr</i></b>  | protein C receptor, endothelial                            | Mm00440992_m1 |
| <b><i>Ptcra</i></b>  | pre T-cell antigen receptor alpha                          | Mm00478363_m1 |
| <b><i>Rag1</i></b>   | recombination activating gene 1                            | Mm01270936_m1 |
| <b><i>Rag2</i></b>   | recombination activating gene 2                            | Mm00501300_m1 |

|               |                                                                                                                                            |               |
|---------------|--------------------------------------------------------------------------------------------------------------------------------------------|---------------|
| <b>Rbpj</b>   | recombination signal binding protein for immunoglobulin kappa J region                                                                     | Mm01217627_g1 |
| <b>Slgh</b>   | Sterile IgH<br>Forward primer: GGACTTTGGGATGGGTTTGGTT<br>Reverse primer: CCCTGGTCCTAGACATCAGAGTAAT<br>Reporter sequence: CCCAGATGAAGGGCTAC | Custom assay  |
| <b>Tcf7</b>   | transcription factor 7, T-cell specific                                                                                                    | Mm00493445_m1 |
| <b>Themis</b> | thymocyte selection associated                                                                                                             | Mm00724485_m1 |
| <b>Vpreb1</b> | pre-B lymphocyte gene 1                                                                                                                    | Mm00785614_sH |
| <b>Vwf</b>    | Von Willebrand factor homolog                                                                                                              | Mm00550376_m1 |

**Supplementary Table 11** Primers and UPL probes used for RT-qPCR

|                    |                                                         |                 |
|--------------------|---------------------------------------------------------|-----------------|
| <b><i>Dll4</i></b> | Fwd: AGGTGCCACTTCGGTTACAC<br>Rev: GGGAGAGCAAATGGCTGATA  | UPL Probe # 106 |
| <b><i>Actb</i></b> | Fwd: AAGGCCAACCGTGAAAAGAT<br>Rev: GTGGTACGACCAGAGGCATAC | UPL probe # 56  |
| <b><i>Hmbs</i></b> | Fwd: TCCCTGAAGGATGTGCCTAC<br>Rev: AAGGGTTTTCCCGTTTGC    | UPL probe # 79  |
| <b><i>Tbp</i></b>  | Fwd: GGGGAGCTGTGATGTGAAGT<br>Rev: CCAGGAAATAATTCTGGCTCA | UPL probe # 97  |

**a**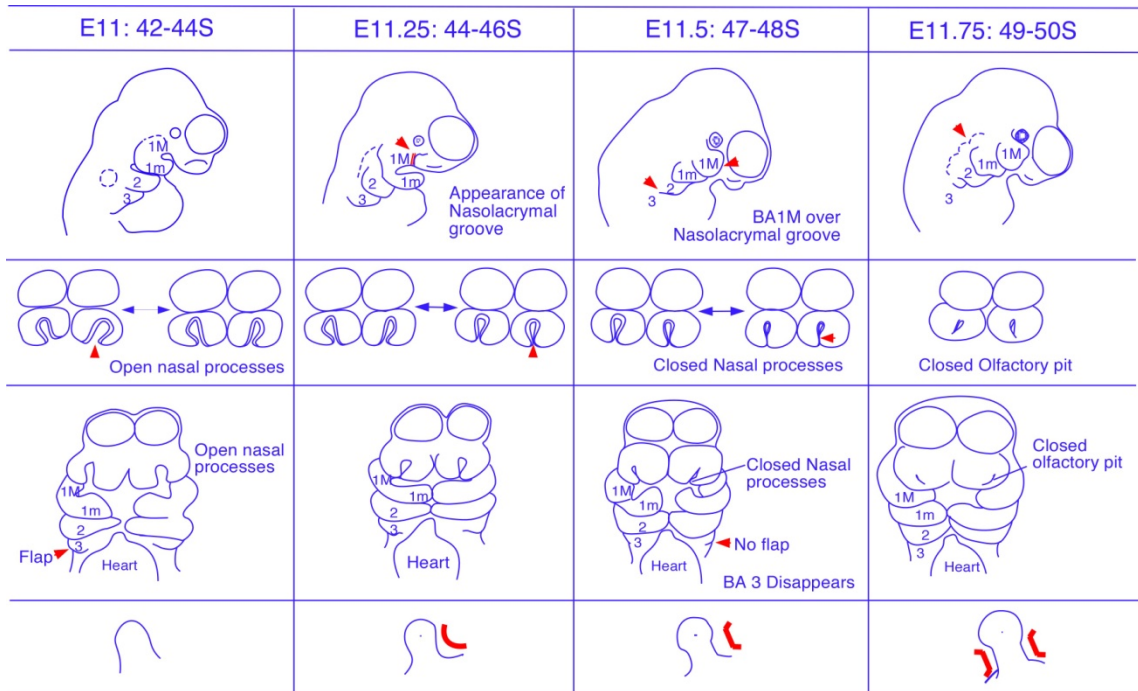**b**

Tail somite (TS) counting

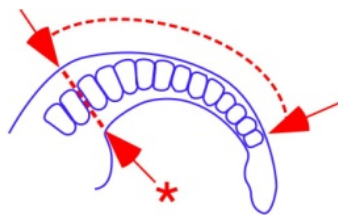

\* Landmark (cloaca)

**c**

E11.5 Thymus rudiment

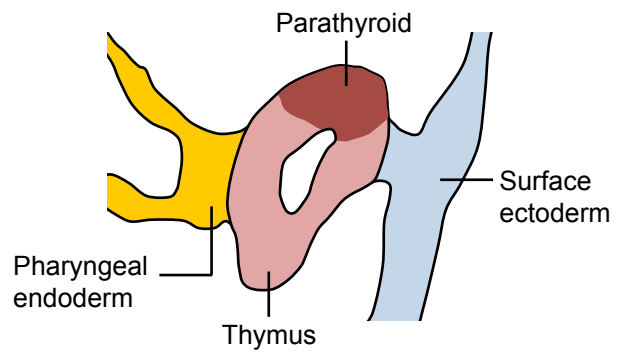**d**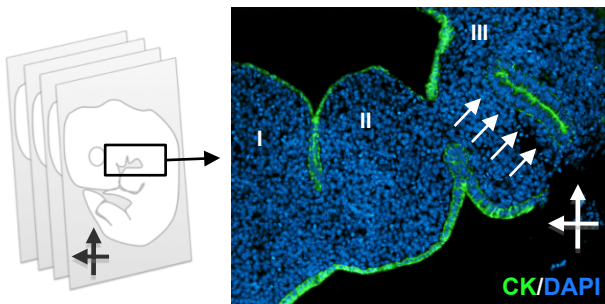**e**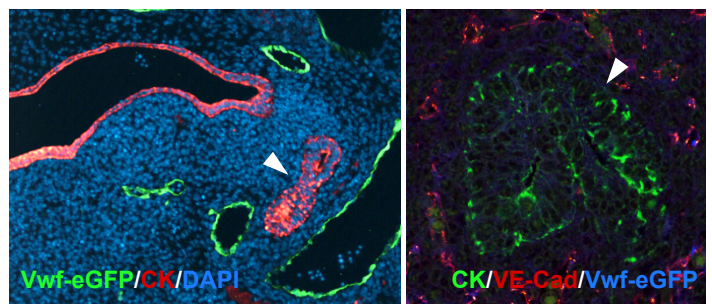

Supplementary Figure 1



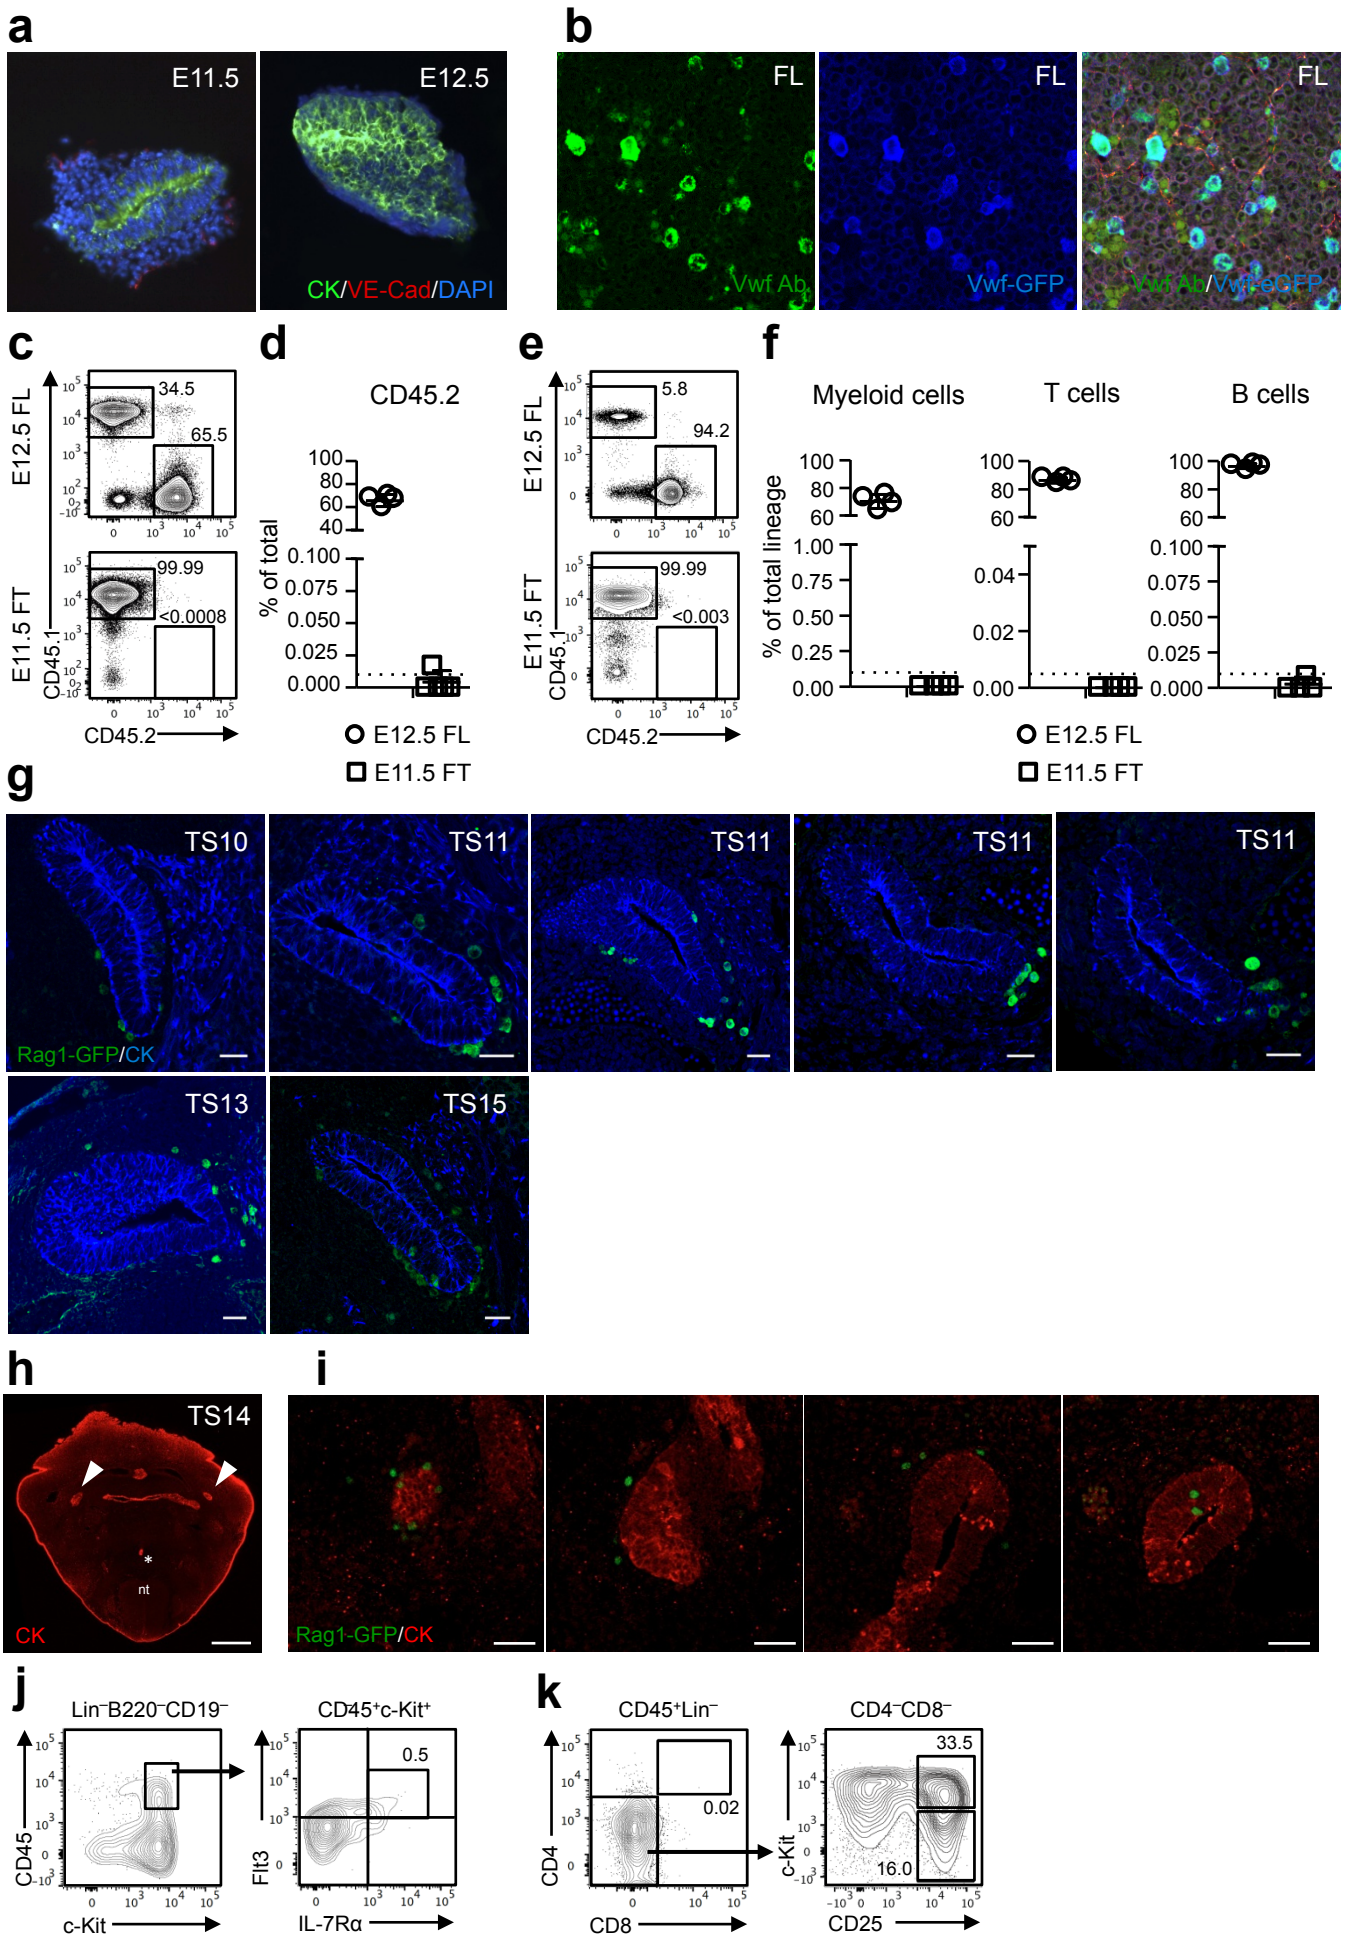

Supplementary Figure 2

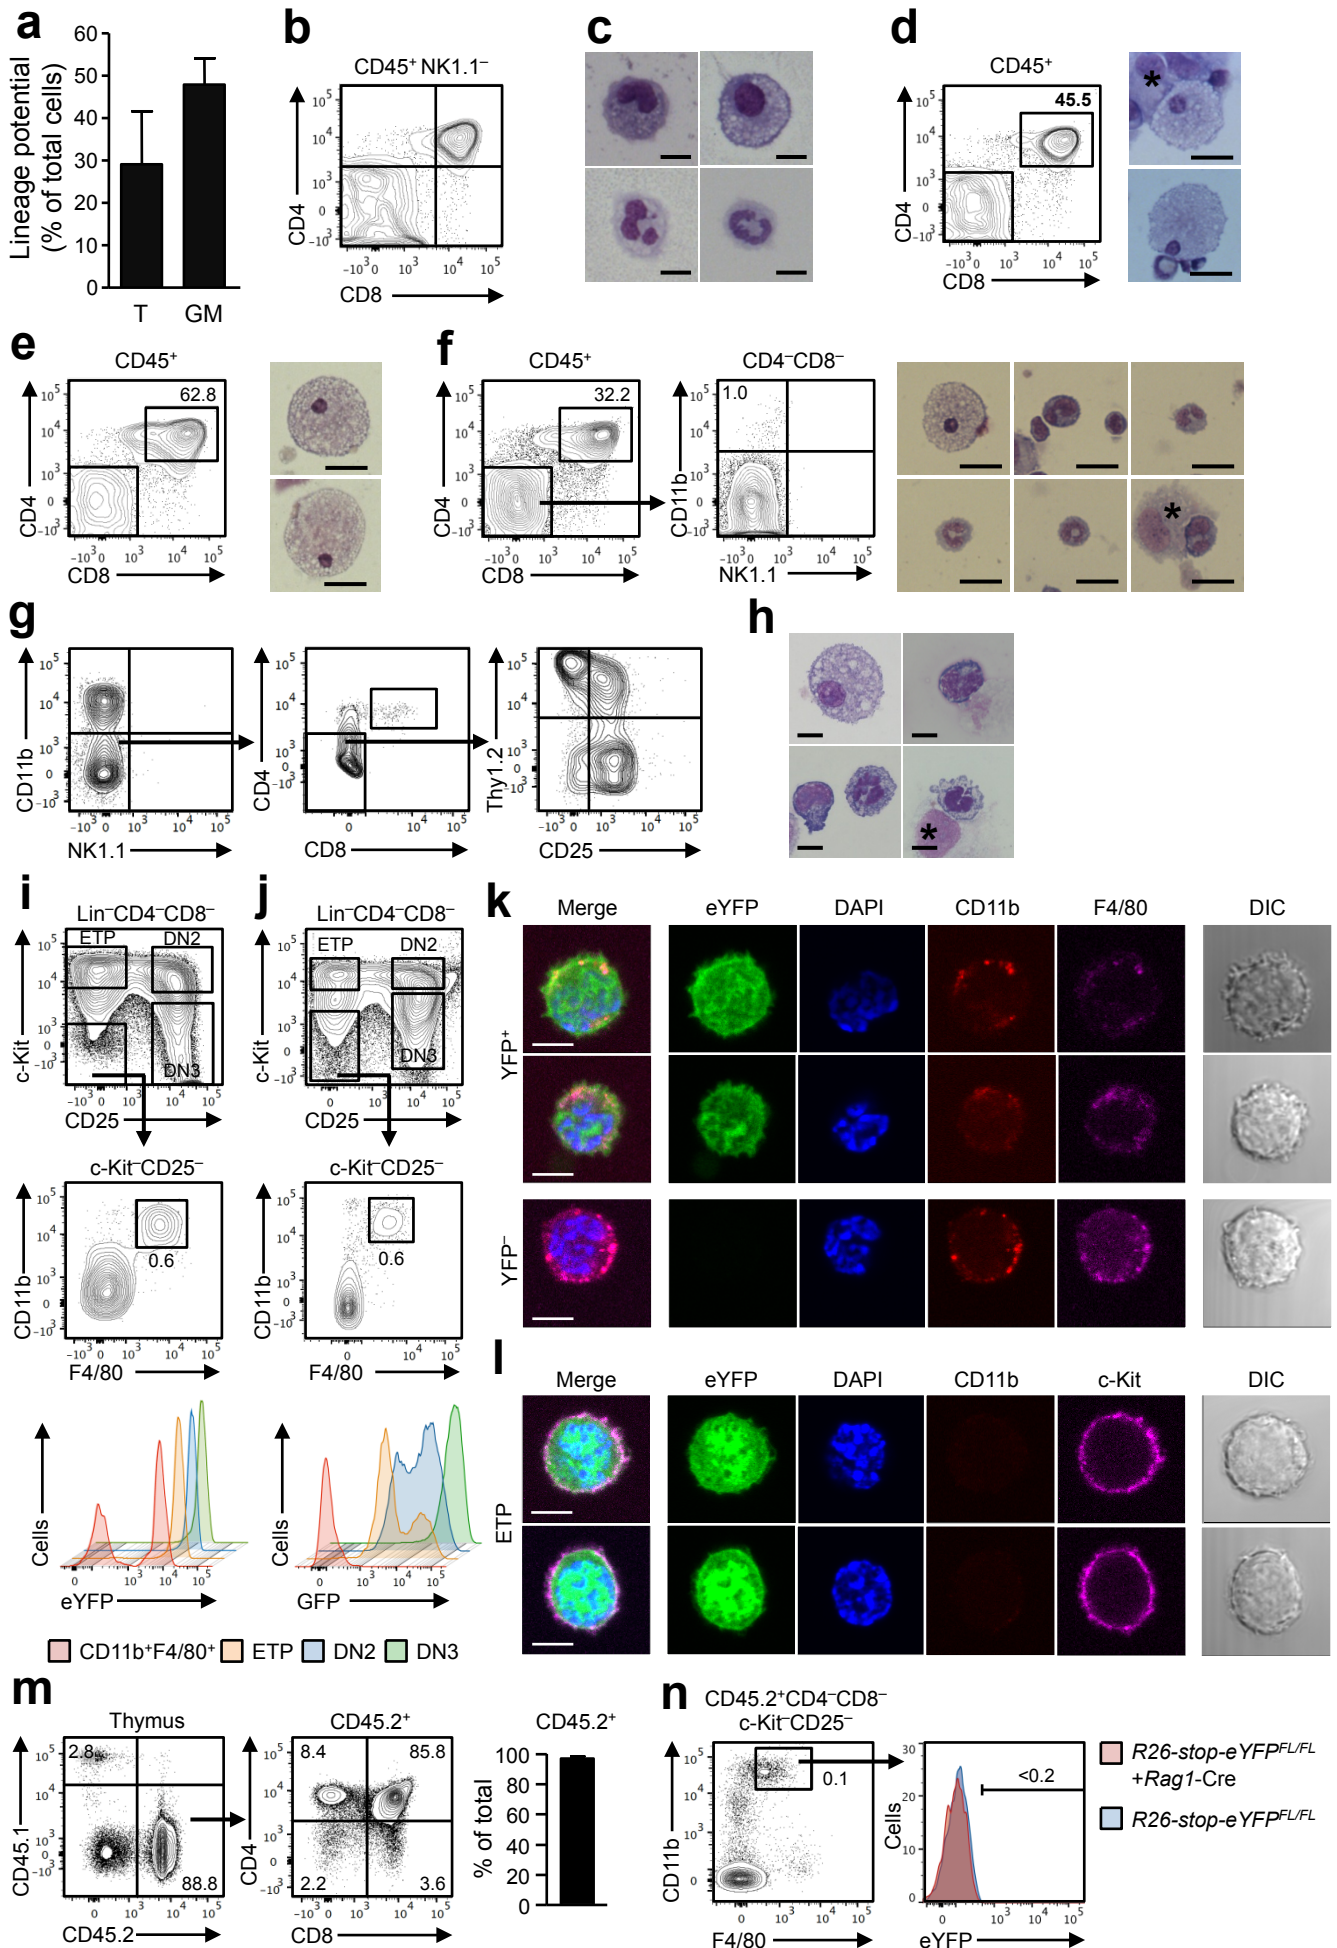

Supplementary Figure 3

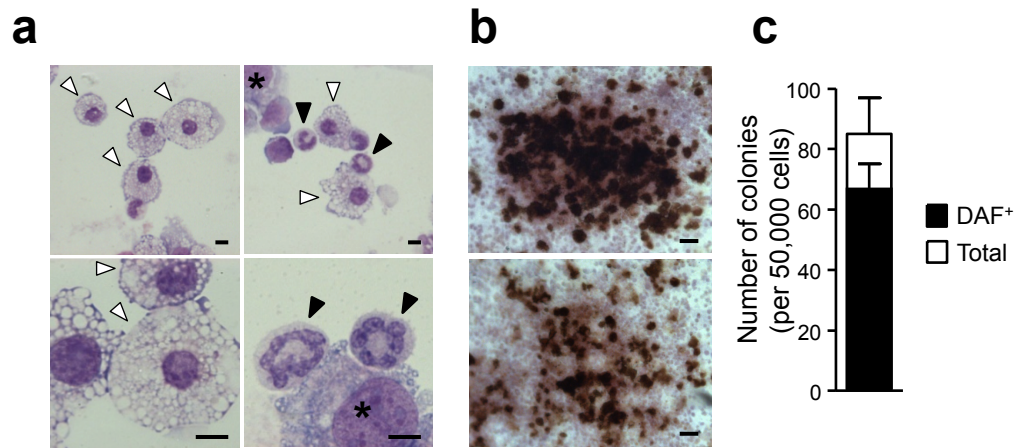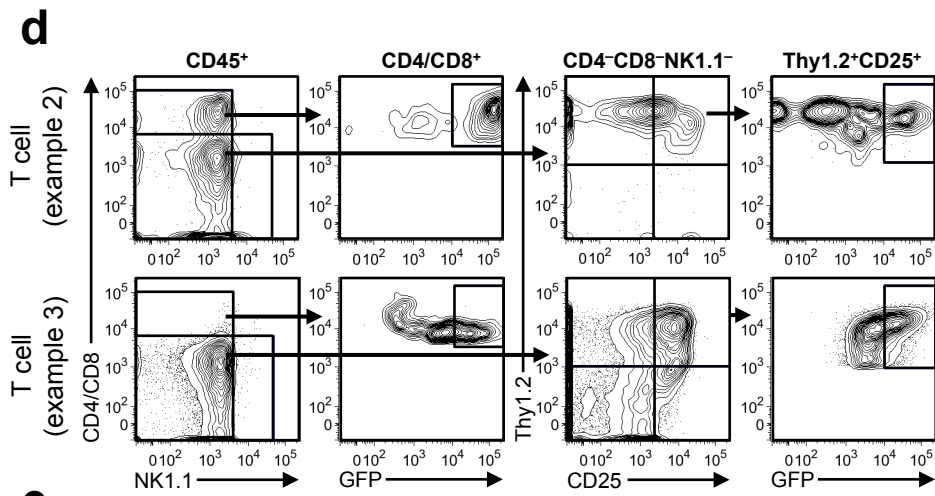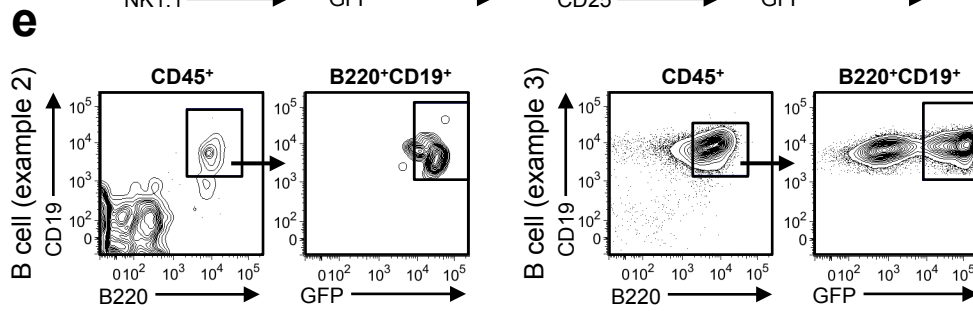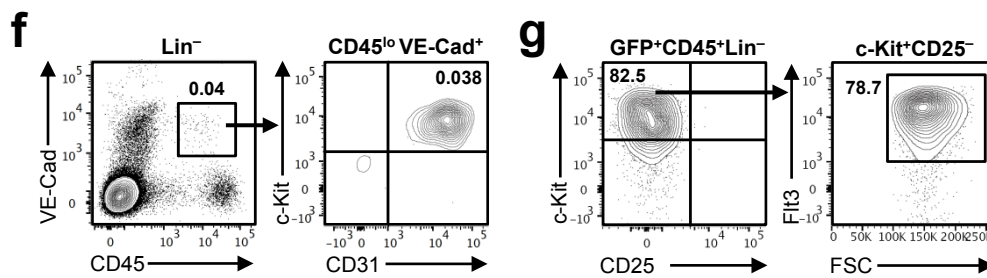

Supplementary Figure 4

**a**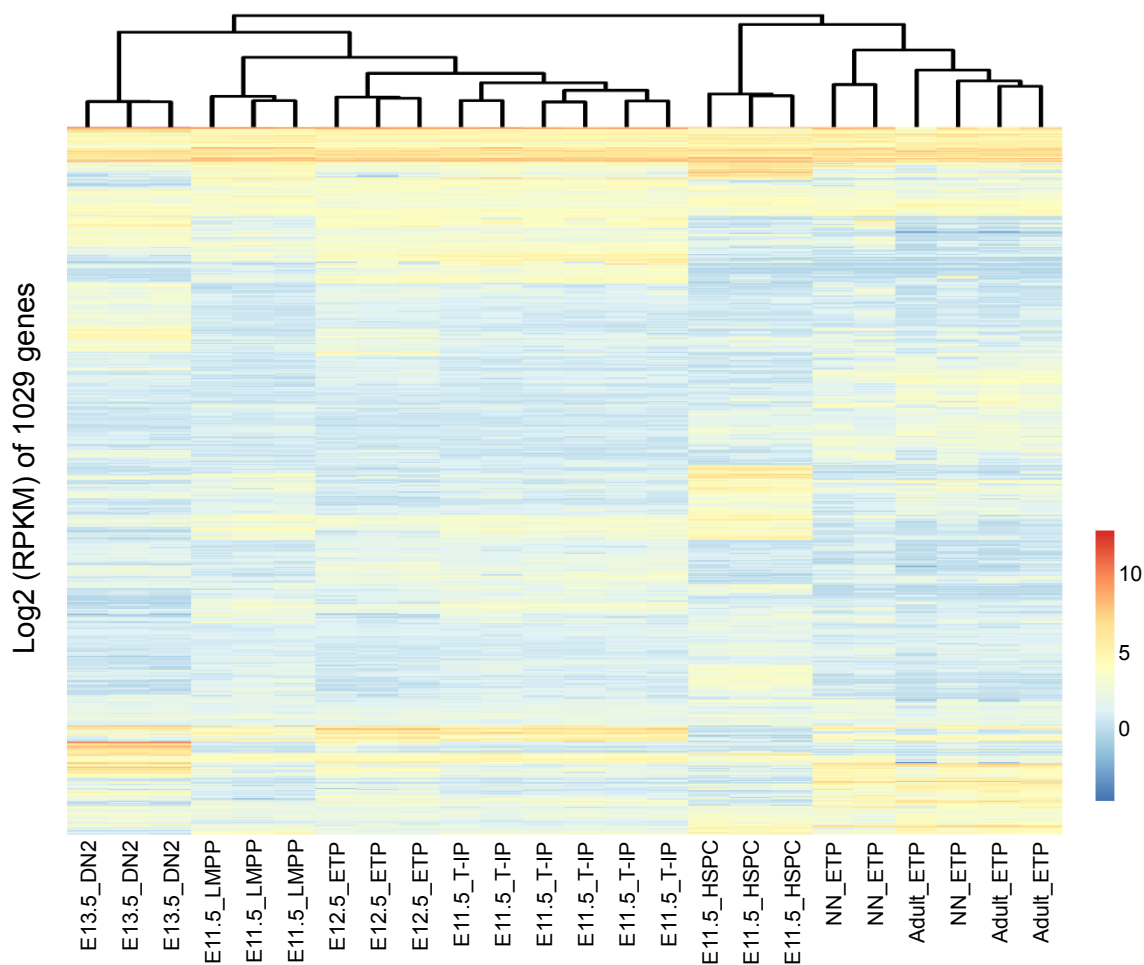**b**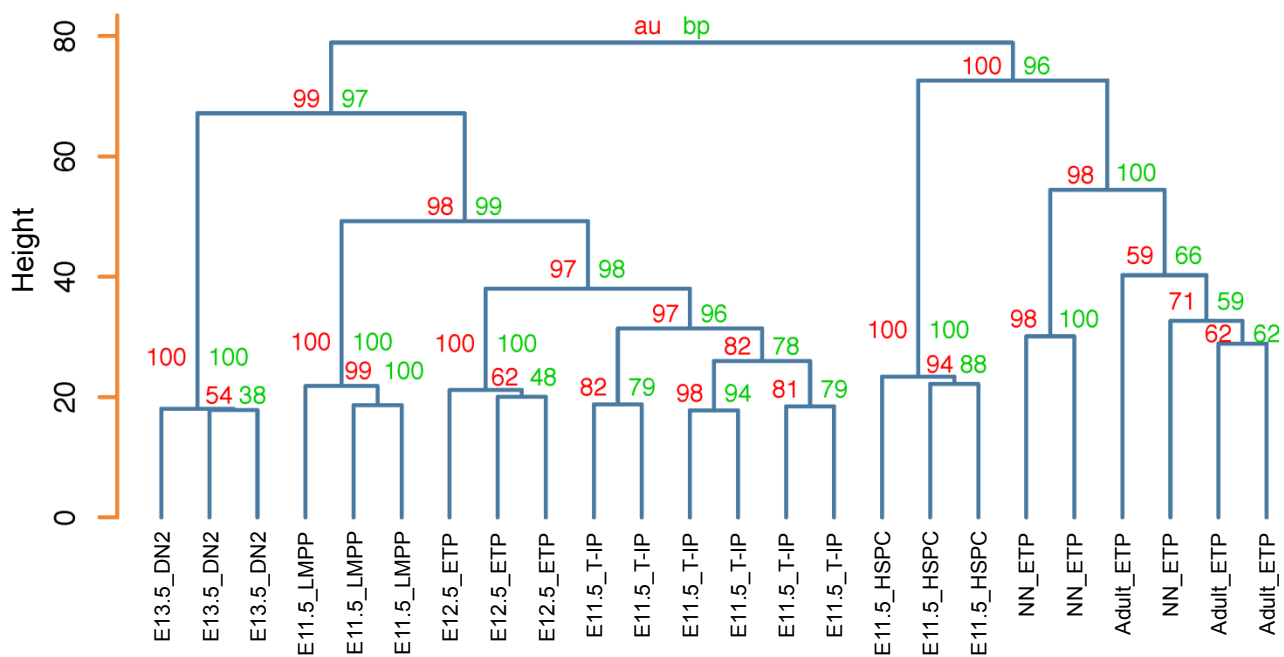**Supplementary Figure 5**

**a**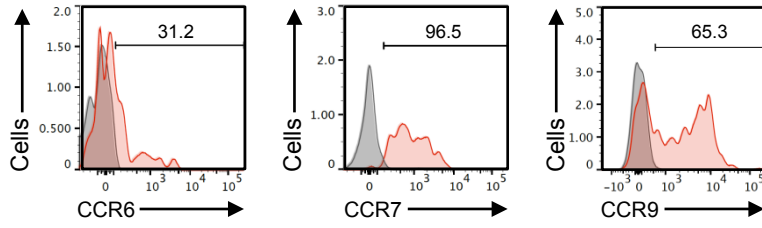**b**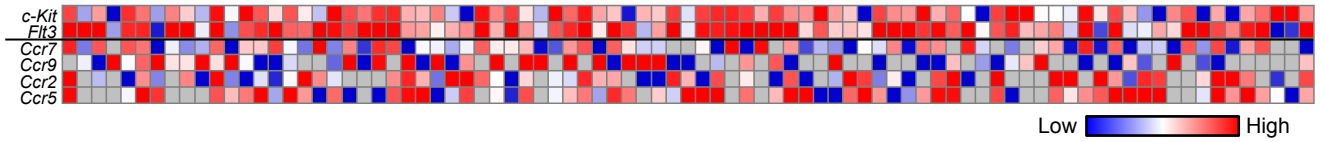**c**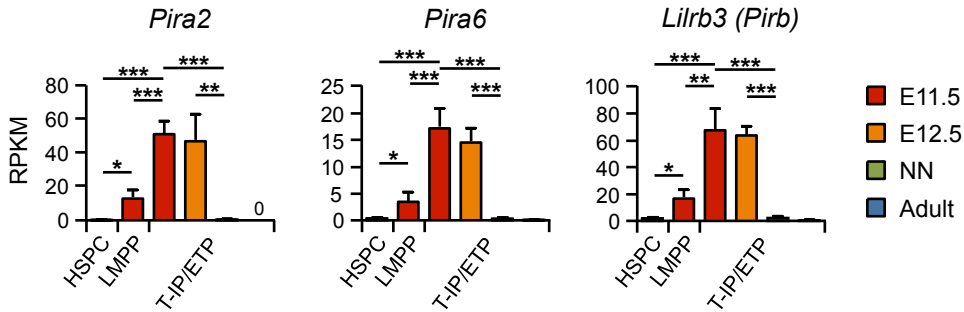**d**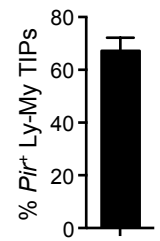**e**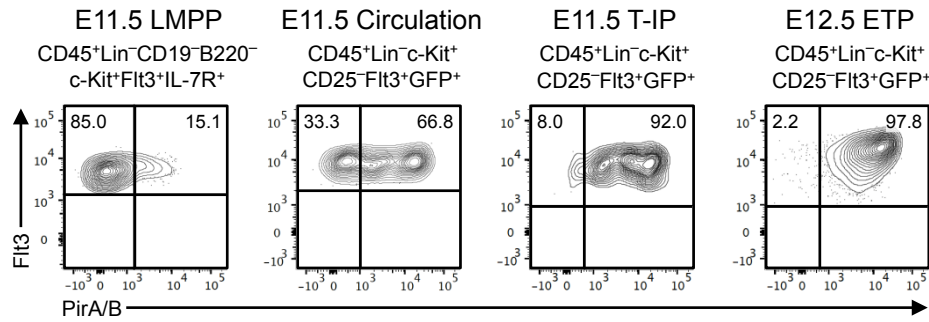**f**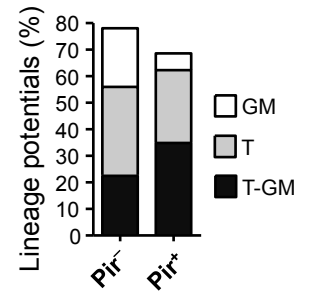

Supplementary Figure 6

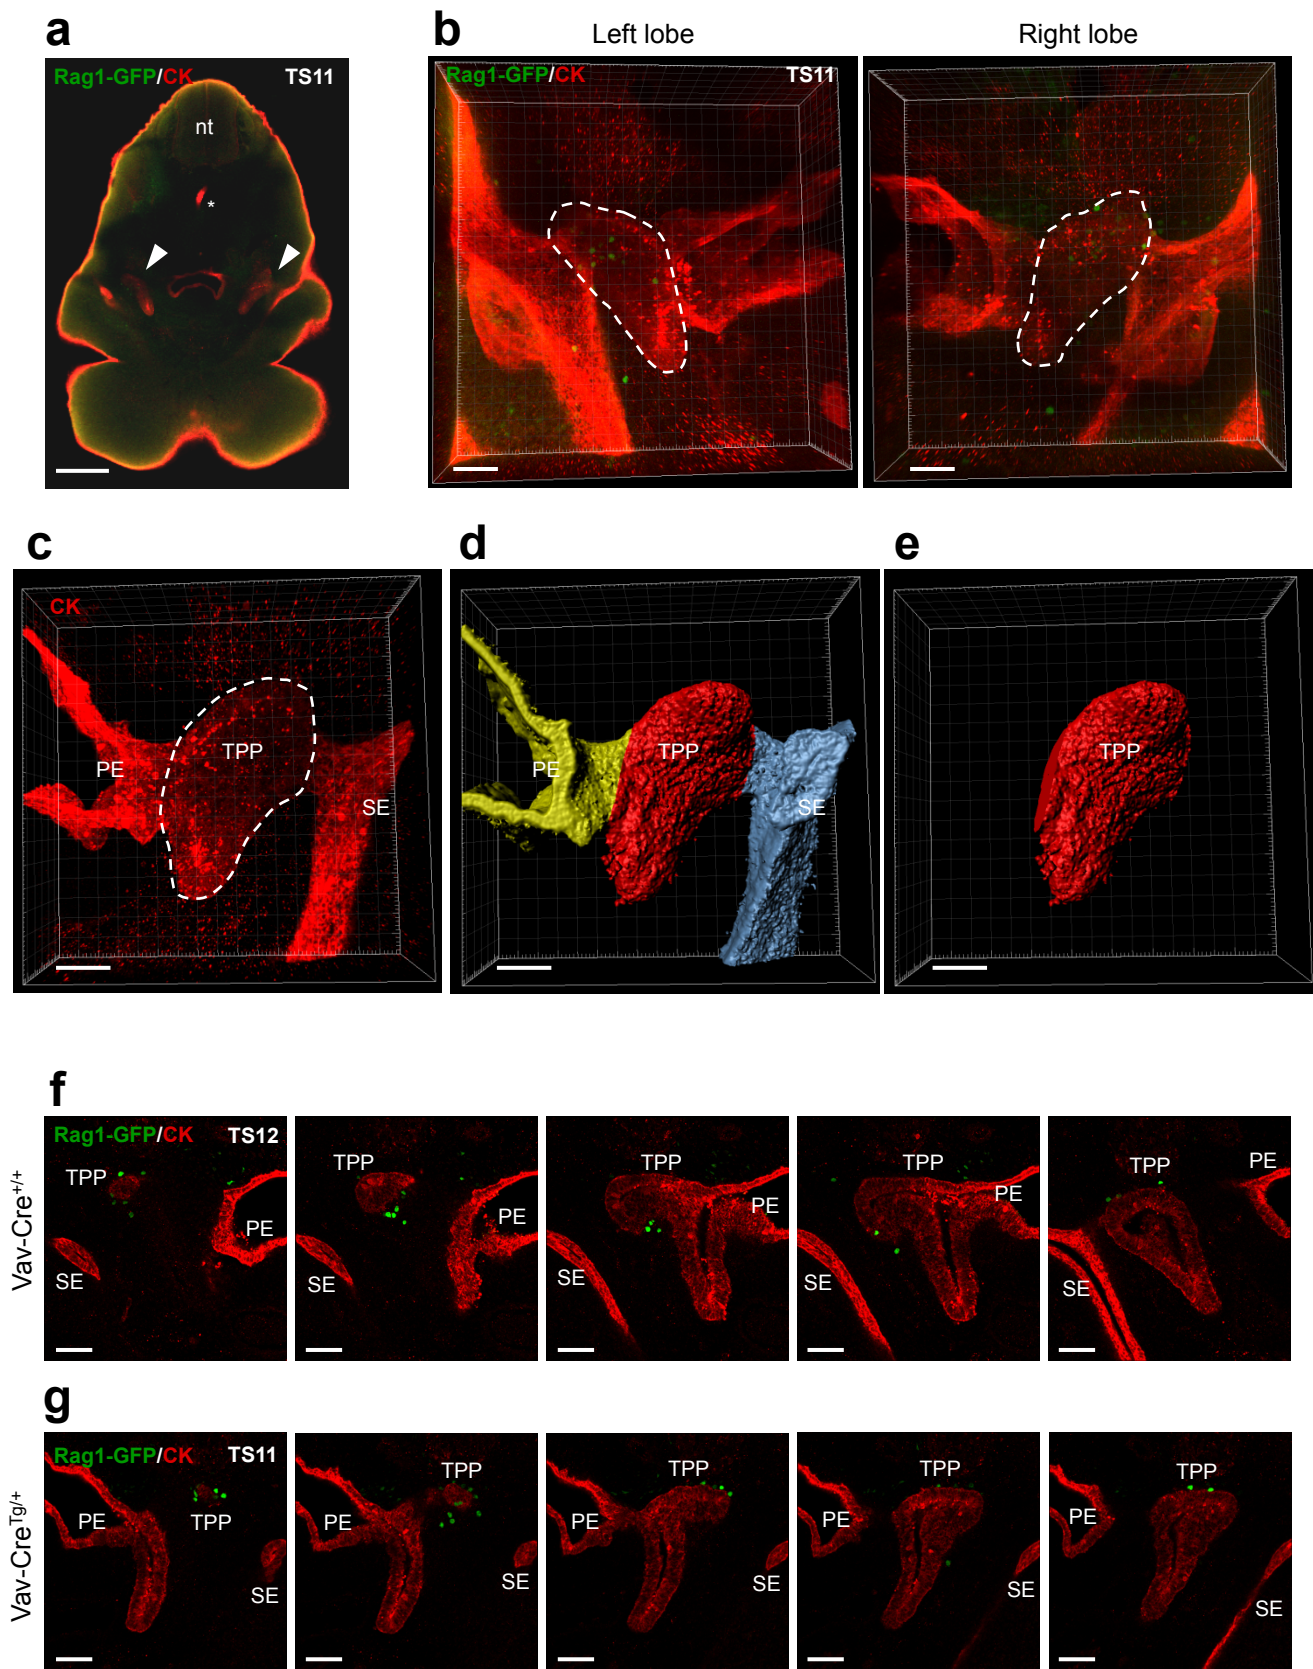

Supplementary Figure 7

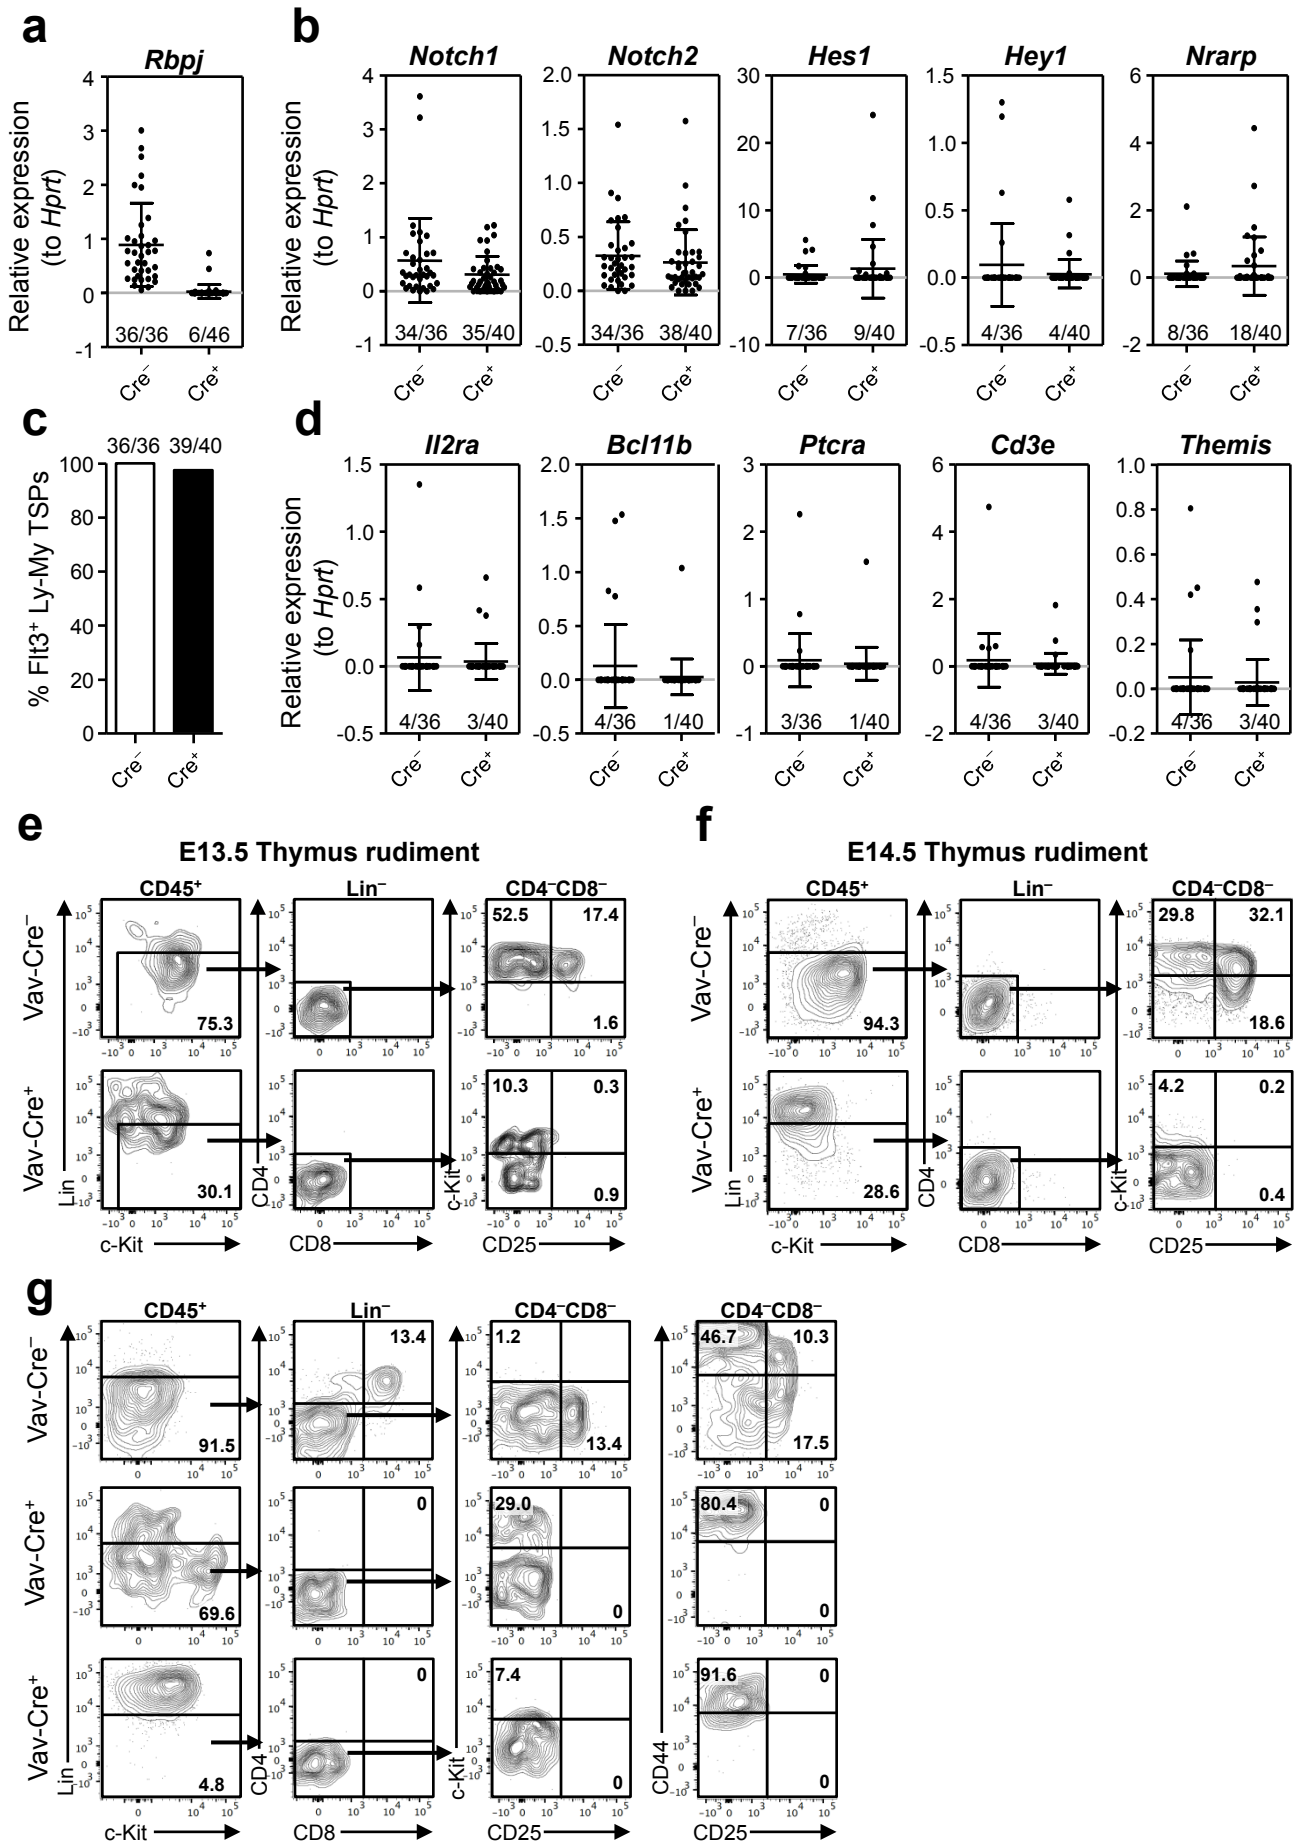

Supplementary Figure 8
